# Supplementary material for: Organic Waste Substrates Induce Important Shifts in Gut Microbiota of Black Soldier Fly (Hermetia illucens L.): Coexistence of Conserved, Variable, and Potential Pathogenic Microbes
Source: PubMed Central journal article supplement (PMC7907179; doi:10.3389/fmicb.2021.635881), 2021-02-12
Supplement: Table_3.pdf [file Table_3.pdf]

**Table S3. PERMANOVA pairwise analysis from the BSF guts.** Bacterial community pairwise analysis are presented in (A), while (B) represents the analysis from the fungal communities.

**A**

| <b>Pairs</b>                   | <b><math>R^2</math></b> | <b><math>p</math>. value</b> |
|--------------------------------|-------------------------|------------------------------|
| Brewery waste vs Kitchen waste | 0.4375516               | 0.001                        |
| Brewery waste vs Poultry waste | 0.2448472               | 0.001                        |
| Brewery waste vs Rabbit waste  | 0.5257139               | 0.001                        |
| Kitchen waste vs Poultry waste | 0.1734253               | 0.016                        |
| Kitchen waste vs Rabbit waste  | 0.4907770               | 0.01                         |
| Poultry waste vs Rabbit waste  | 0.3541034               | 0.001                        |

**B**

| <b>Pairs</b>       | <b><math>R^2</math></b> | <b><math>p</math>. value</b> |
|--------------------|-------------------------|------------------------------|
| Brewery vs Kitchen | 0.9216147               | 0.001                        |
| Brewery vs Rabbit  | 0.7865690               | 0.001                        |
| Kitchen vs Rabbit  | 0.7520458               | 0.001                        |
